# Supplementary material for: Designing for Clinical Change: Creating an Intervention to Implement New Statin Guidelines in a Primary Care Clinic
Source: PubMed Central journal article supplement (PMC5941089; doi:10.2196/humanfactors.9030), 2018-04-24
Supplement: humanfactors_v5i2e19_app1.pdf [file humanfactors_v5i2e19_app1.pdf]

## Multimedia Appendix 1: Single-Page VA/DoD and ACC/AHA Clinical Practice Guidelines Educational Tool.

Concise comparison of VA/DoD and ACC/AHA guidelines for provider education and use.

| <b>Risk Category</b>                            | <b>VA/DoD Clinical recommendation</b>                                                                                                                                                                                                                                                                                                                                                                                                                                                                         | <b>ACC/AHA guideline</b>                                                       |
|-------------------------------------------------|---------------------------------------------------------------------------------------------------------------------------------------------------------------------------------------------------------------------------------------------------------------------------------------------------------------------------------------------------------------------------------------------------------------------------------------------------------------------------------------------------------------|--------------------------------------------------------------------------------|
| Clinical atherosclerotic cardiovascular disease | If recent, moderate or high-intensity statin.<br>If not recent, moderate- potency statin.                                                                                                                                                                                                                                                                                                                                                                                                                     | If age $\leq 75$ , high-intensity statin. If $>75$ , moderate- potency statin. |
| Diabetes                                        | Moderate-intensity statin                                                                                                                                                                                                                                                                                                                                                                                                                                                                                     | Moderate-intensity statin                                                      |
| LDL $\geq 190$ md/dl                            | Moderate-intensity statin                                                                                                                                                                                                                                                                                                                                                                                                                                                                                     | Moderate-intensity statin                                                      |
| Risk-based                                      | <ul style="list-style-type: none"> <li>- <math>\geq 12\%</math> estimated 10-year risk                             <ul style="list-style-type: none"> <li>- Moderate-potency statin</li> </ul> </li> <li>- 6-12% estimated 10-year risk                             <ul style="list-style-type: none"> <li>- Shared decision-making</li> </ul> </li> <li>- <math>&lt; 6\%</math> estimated 10-year risk                             <ul style="list-style-type: none"> <li>- No statin</li> </ul> </li> </ul> | $\geq 7.5\%$ estimated 10-year ASCVD risk, moderate- or high-potency statin    |
