# Supplementary material for: Designing for Clinical Change: Creating an Intervention to Implement New Statin Guidelines in a Primary Care Clinic
Source: PubMed Central journal article supplement (PMC5941089; doi:10.2196/humanfactors.9030), 2018-04-24
Supplement: humanfactors_v5i2e19_app2.pdf [file humanfactors_v5i2e19_app2.pdf]

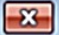

Mr./Ms. [name] had a [insert: heart attack, stroke, peripheral vascular disease, TIA], but s/he is not listed as being on a statin drug. People who have had cardiovascular disease are at high risk of future similar events. VA/DoD Guidelines recommend this patient be on at least a moderate-potency statin.

During this visit did you start [or stop, if risk <6%] a statin medicine?

- Yes  
 No

If not, why not?

- After discussion, the patient decided against statin  
 Strong history of nonadherence  
 Allergy/Intolerance  
 I think this patient's life expectancy is <5 years  
 Already receives a statin from another source  
 The reminder is incorrect and s/he was placed in an incorrect risk category. (Please note the way the risk category is wrong in comments)  
 I do not think s/he needs one. (Please explain why not in comments)

Comments

Clear

Clinical Maint

Visit Info

< Back

Next >

Finish

Cancel

Health Factors: STATINS

\* Indicates a Required Field
