# Supplementary material for: Designing for Clinical Change: Creating an Intervention to Implement New Statin Guidelines in a Primary Care Clinic
Source: PubMed Central journal article supplement (PMC5941089; doi:10.2196/humanfactors.9030), 2018-04-24
Supplement: humanfactors_v5i2e19_app3.pdf [file humanfactors_v5i2e19_app3.pdf]

| <b>Risk Category</b>                            | <b>VA/DoD Clinical recommendation</b>                              | <b>HEDIS Performance Measure</b> | <b>VA Proposed Performance Measure</b> |
|-------------------------------------------------|--------------------------------------------------------------------|----------------------------------|----------------------------------------|
| Clinical atherosclerotic cardiovascular disease | Moderate dose statin, consider titrating to high dose as tolerated | Includes                         | 5 points                               |
| Diabetes                                        | Moderate dose statin                                               | Includes                         | 3 points                               |
| LDL $\geq$ 190 md/dl                            | Moderate dose statin                                               | ---                              | 1 point                                |
| $\geq$ 12% estimated 10-year ASCVD risk         | Moderate dose statin                                               | ---                              | 1 points                               |
| 6-12% estimated 10-year ASCVD risk              | Shared decision-making                                             | ---                              | Shared-decision-making                 |
| <6% estimated 10-year ASCVD risk                | No statin                                                          | ---                              | 1 point if no statin use               |
