# Supplementary material for: Designing for Clinical Change: Creating an Intervention to Implement New Statin Guidelines in a Primary Care Clinic
Source: PubMed Central journal article supplement (PMC5941089; doi:10.2196/humanfactors.9030), 2018-04-24
Supplement: humanfactors_v5i2e19_app4.pdf [file humanfactors_v5i2e19_app4.pdf]

**Primary Care Panel: Physician Performance Measurement Report as of <DATE>  
<NAME OF PCP>, Medicine Service – General Medicine Section**

**VA/DOD Clinical Guidelines for Dyslipidemia – Performance Measure Summary**

| MEASURE                      | DESCRIPTION                                                                           | VA GOAL | PATIENTS ELIGIBLE | PATIENTS MEETING | PATIENTS NOT MEETING | % MEETING | PROVIDER PERCENTILE |
|------------------------------|---------------------------------------------------------------------------------------|---------|-------------------|------------------|----------------------|-----------|---------------------|
| Statin use: History of ASCVD | Dx: All patients with ASCVD, Age 40-75<br>Goal: Moderate or high dose statin          | 80%     | 29                | 9                | 20                   | 31%       | 60                  |
| Statin use: Diabetes         | Dx: DM, Age 40-75<br>Goal: Moderate dose statin                                       | 70%     | 13                | 5                | 8                    | 38%       | 54                  |
| Statin use: LDL $\geq 190$   | Dx: LDL $\geq 190$ md/dl, DM, Age 40-75<br>Goal: Moderate dose statin                 | 60%     | 1                 | 0                | 1                    | 0%        | 8                   |
| Statin use: High risk        | Dx: $\geq 12\%$ estimated 10-year ASCVD risk, Age 40-75<br>Goal: Moderate dose statin | 60%     | 21                | 13               | 8                    | 62%       | 29                  |
| Statin overuse: Low risk     | Dx: $<4\%$ estimated 10-year ASCVD risk, Age 40-75<br>Goal: No Statin                 | $<10\%$ | 11                | 1                | 10                   | 9%        | 83                  |

**VA/DOD Clinical Guidelines for Dyslipidemia – Overall Performance Measure Summary**

| MEASURE            | DESCRIPTION                                                                                                                                                                                                                                                    | VA GOAL | PATIENTS ELIGIBLE | PATIENTS MEETING | PATIENTS NOT MEETING | % MEETING | PROVIDER PERCENTILE |
|--------------------|----------------------------------------------------------------------------------------------------------------------------------------------------------------------------------------------------------------------------------------------------------------|---------|-------------------|------------------|----------------------|-----------|---------------------|
| Overall Statin use | Dx: A) DM (3 points), LDL $\geq 190$ md/dl (1 point), 10-year CVD risk score $\geq 12$ or ASCVD for ages 40-75 (1 point), or all patients with ASCVD (5 points), B) $<4\%$ estimated 10-year CVD risk (1 point)<br>Goal: A) Moderate dose statin, B) No statin | $>70$   | 1916              | 707              | 1209                 | 37%       | 50                  |
