# Supplementary material for: Designing for Clinical Change: Creating an Intervention to Implement New Statin Guidelines in a Primary Care Clinic
Source: PubMed Central journal article supplement (PMC5941089; doi:10.2196/humanfactors.9030), 2018-04-24
Supplement: humanfactors_v5i2e19_app5.pdf [file humanfactors_v5i2e19_app5.pdf]

| <b>Tool</b>                      | <b>Topic</b>                 | <b>Suggestion</b>                                                                                                                          | <b>Impact on adoption</b>                                            |                      |
|----------------------------------|------------------------------|--------------------------------------------------------------------------------------------------------------------------------------------|----------------------------------------------------------------------|----------------------|
| Clinical decision support design | Scenario Language—Add Detail | Include “high/medium/low risk” language in reminder                                                                                        | Implemented                                                          |                      |
|                                  |                              | Use lay language for “elevated ASCVD risk score”— i.e. “elevated risk of heart attack”                                                     | Implemented                                                          |                      |
|                                  |                              | Clearly define moderate vs high potency statin                                                                                             | Implemented                                                          |                      |
|                                  |                              | Pre-populate risk score automatically within reminder                                                                                      | Future consideration                                                 |                      |
|                                  |                              | Add links to guidelines and background information                                                                                         | Future consideration                                                 |                      |
|                                  |                              | Add specific risk percentage in reminder rather than “high/medium/low” language                                                            | Not used                                                             |                      |
|                                  | Reminder Algorithm           | Disable reminder for patients receiving palliative care                                                                                    | Implemented                                                          |                      |
|                                  |                              | Only alert when appropriate (disable for patients with complicated clinical situations)                                                    | Future consideration                                                 |                      |
|                                  |                              | Add additional pop-up reminder for comments                                                                                                | Not used                                                             |                      |
|                                  | Answer Choices               | Add “receiving statin from other source” option                                                                                            | Implemented                                                          |                      |
|                                  |                              | Add “did not have time to address at this visit” option                                                                                    | Future consideration                                                 |                      |
|                                  |                              | Remove “hx of nonadherence” option                                                                                                         | Not used                                                             |                      |
|                                  | Helpful Additions            | “Order now” option                                                                                                                         | Future consideration                                                 |                      |
|                                  |                              | Direct link to risk calculator                                                                                                             | Future consideration                                                 |                      |
|                                  |                              | Add link to algorithm                                                                                                                      | Future consideration                                                 |                      |
|                                  | Audit and feedback design    | Goals/Targets                                                                                                                              | Clarify provider comparison group (local vs. VA)                     | Future consideration |
|                                  |                              |                                                                                                                                            | Remove provider percentile altogether because it creates undue angst | Not used             |
|                                  |                              |                                                                                                                                            | Standardize goal percentages across categories                       | Not used             |
| A&F Algorithm                    |                              | Provide credit for shared decision making                                                                                                  | Future consideration                                                 |                      |
|                                  |                              | Devise mechanism/algorithm that accounts for complicated patients in performance measure and subsequently in the audit and feedback report | Future consideration                                                 |                      |
| Actionable Feedback              |                              | Organize patient “fallout” by risk category                                                                                                | Implemented                                                          |                      |
|                                  |                              | Include specific and actionable performance improvement suggestions                                                                        | Future consideration                                                 |                      |
| Simplify Language                |                              | Replace men/women with M/F                                                                                                                 | Implemented                                                          |                      |
| General suggestions              | Educational opportunities    | Journal club/ educational session requested when new guidelines emerge                                                                     | Future consideration                                                 |                      |
